# Supplementary material for: Dietary intervention improves health metrics and life expectancy of the genetically obese Titan mouse
Source: PubMed Central journal article supplement (PMC9065075; doi:10.1038/s42003-022-03339-3), 2022-05-03
Supplement: 42003_2022_3339_MOESM1_ESM.pdf [file 42003_2022_3339_MOESM1_ESM.pdf]

## Supplementary figures and tables

### Dietary intervention improves health metrics and life expectancy of the genetically obese Titan mouse

Annika Müller-Eigner<sup>1†</sup>, Adrián Sanz-Moreno<sup>2†</sup>, Irene de-Diego<sup>1†</sup>, Anuroop Venkateswaran Venkatasubramani<sup>3</sup>, Martina Langhammer<sup>4</sup>, Raffaele Gerlini<sup>2,5</sup>, Birgit Rathkolb<sup>2,5,6</sup>, Antonio Aguilar-Pimentel<sup>2</sup>, Tanja Klein-Rodewald<sup>2</sup>, Julia Calzada-Wack<sup>2</sup>, Lore Becker<sup>2</sup>, Sergio Palma-Vera<sup>7</sup>, Benedikt Gille<sup>1</sup>, Ignasi Forne<sup>3</sup>, Axel Imhof<sup>3</sup>, Chen Meng<sup>8</sup>, Christina Ludwig<sup>8</sup>, Franziska Koch<sup>9</sup>, John T. Heiker<sup>10</sup>, Angela Kuhla<sup>11</sup>, Vanessa Caton<sup>12</sup>, Julia Brenmoehl<sup>12</sup>, Henry Reyer<sup>12</sup>, Jennifer Schoen<sup>7,13</sup>, Helmut Fuchs<sup>2</sup>, Valerie Gailus-Durner<sup>2</sup>, Andreas Hoefflich<sup>12</sup>, Martin Hrabe de Angelis<sup>2,5,14</sup> and Shahaf Peleg<sup>1,15</sup>

<sup>1</sup>Research Group Epigenetics, Metabolism and Longevity, Leibniz Institute for Farm Animal Biology, 18196 Dummerstorf, Germany

<sup>2</sup>Institute of Experimental Genetics, German Mouse Clinic, Helmholtz Zentrum München, German Research Center for Environment and Health (GmbH), 85764 Neuherberg, Germany

<sup>3</sup>Department of Molecular Biology, Biomedical Center Munich, Ludwig-Maximilians University, 82152 Planegg-Martinsried, Germany

<sup>4</sup>Institute Genetics and Biometry, Lab Animal Facility, Leibniz Institute for Farm Animal Biology, 18196 Dummerstorf, Germany

<sup>5</sup>German Center for Diabetes Research (DZD), 85764, Neuherberg, Germany

<sup>6</sup>Institute of Molecular Animal Breeding and Biotechnology, Gene Center, Ludwig-Maximilians-University Munich, 81377 Munich, Germany

<sup>7</sup>Institute of Reproductive Biology, Leibniz Institute for Farm Animal Biology, FBN, 18196 Dummerstorf, Germany.

<sup>8</sup>Bavarian Center for Biomolecular Mass Spectrometry (BayBioMS), Technical University of Munich, 85354, Freising, Germany

<sup>9</sup>Institute of Nutritional Physiology, Leibniz Institute for Farm Animal Biology, 18196 Dummerstorf, Germany

<sup>10</sup>Helmholtz Institute for Metabolic, Obesity and Vascular Research (HI-MAG) of the Helmholtz Zentrum München at the University of Leipzig and University Hospital Leipzig, Leipzig, Germany

<sup>11</sup>Institute for Experimental Surgery, Rostock University Medical Center, Rostock, Germany

<sup>12</sup>Institute for Genome Biology, Leibniz Institute for Farm Animal Biology, 18196 Dummerstorf, Germany

<sup>13</sup>Department of Reproduction Biology, Leibniz Institute for Zoo and Wildlife Research (IZW), Berlin, Germany

<sup>14</sup>Chair of Experimental Genetics, TUM School of Life Sciences (SoLS), Technische Universität München, 85354 Freising, Germany

<sup>15</sup>Institute of Neuroregeneration and Neurorehabilitation of Qingdao University, Qingdao, China

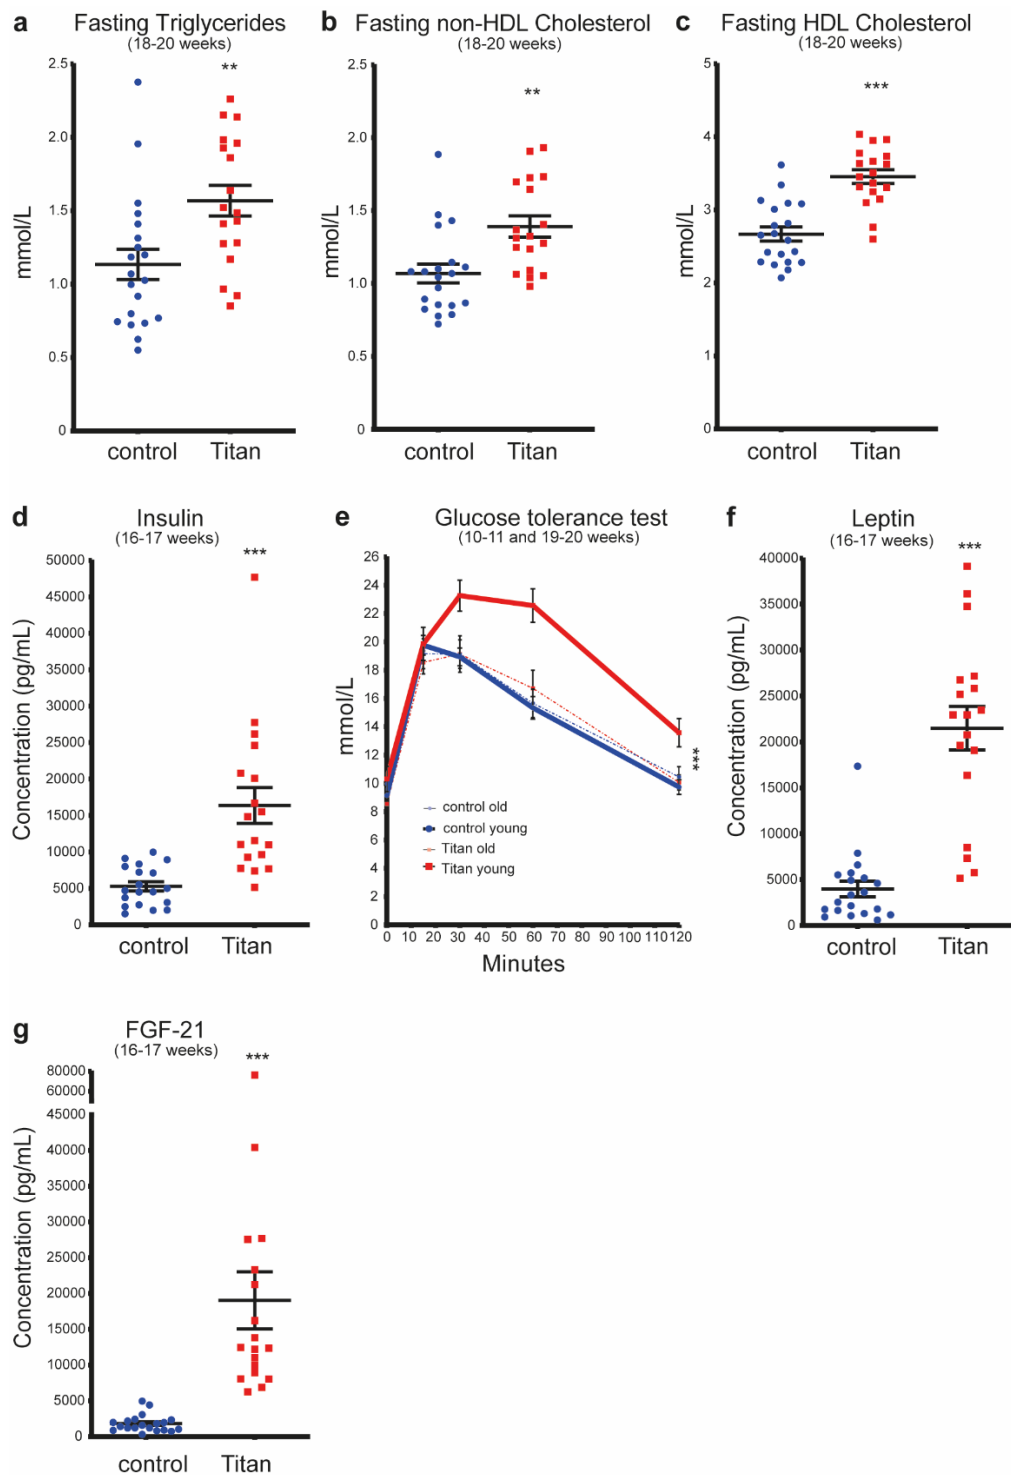

**Supplementary Figure 1: Titan mice display several molecular criteria for metabolically unhealthy obesity.**

**a-c** Plasma analyses comparing control and Titan mice after fasting at 18–20 weeks. Titan mice showed higher levels of triglycerides ( $p = 0.0055$ ) and both non-HDL (high-density lipoprotein) ( $p = 0.0022$ ) and HDL cholesterol in control ( $n = 20$ ) and Titan ( $n = 19$ ) mice. **d** Insulin levels in control ( $n = 19$ ) and Titan ( $n = 18$ ) mice at 16–17 weeks of age. **e** Glucose tolerance test at 10-11 weeks of age in control ( $n = 20$ ) and Titan ( $n = 17$ ) and 16-17 weeks of age in control ( $n = 18$ ) and Titan ( $n = 14$ ) animals. 10-11 weeks old Titan mice show impaired glucose clearance ( $p < 0.0001$ , area under curve) compared to the control group. In contrast, no significant difference (Mann-Whitney  $U$  test,  $p = 0.8077$ , area under curve) is observed at 16-17 weeks of age. **f** Leptin and **g** FGF21 levels in control ( $n = 20$ ) and Titan ( $n = 18$ ) mice.  $**p < 0.01$   $***p < 0.001$ . Error bars indicate SEM. Unpaired two-tailed  $t$ -tests with Welch's correction were used to calculate  $p$ -values.

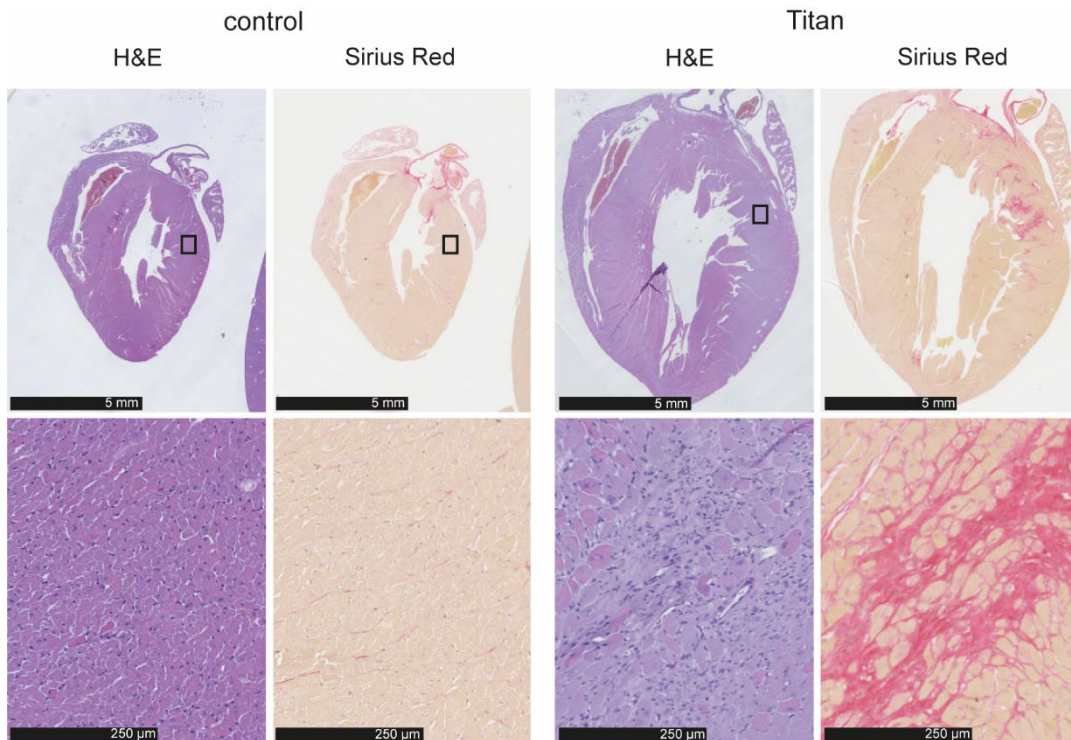

**Supplementary Figure 2: Titan mice show signs of heart fibrosis.**

Hematoxylin and eosin and Sirius Red stainings of the heart from 16-17-weeks-old control and Titan mice are shown (0.45x magnification). Sirius Red staining allows a better visualization of fibrotic tissue. Higher magnification pictures from rectangles were taken at 10x magnification.

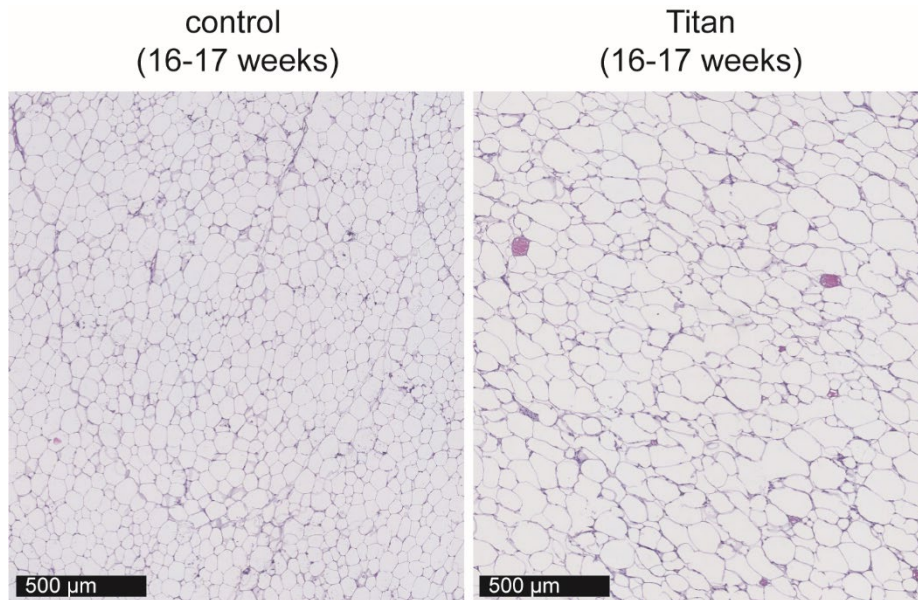

**Supplementary Figure 3: WAT H&E staining comparison of control vs. Titan mice.**

Hematoxylin and eosin staining of perigonadal white adipose tissue shows the hypertrophic size of adipocytes in 16–17 week old Titan mice (5x magnification).

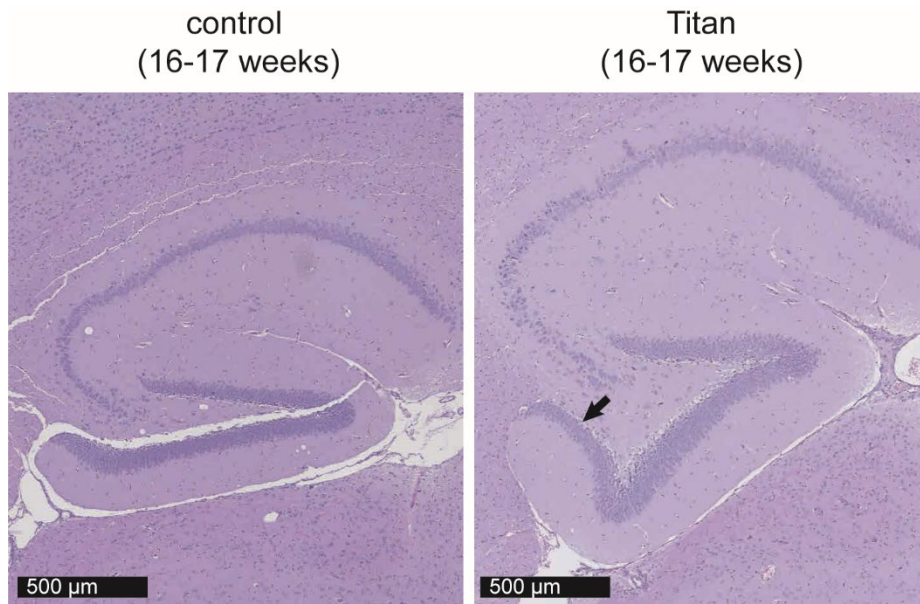

**Supplementary Figure 4: Hippocampal H&E staining comparison of control vs. Titan mice.**

Hematoxylin and eosin staining of the hippocampus shows an abnormal angle of the dentate gyrus (arrow) in 16–17 weeks of age Titan mice (5x magnification).



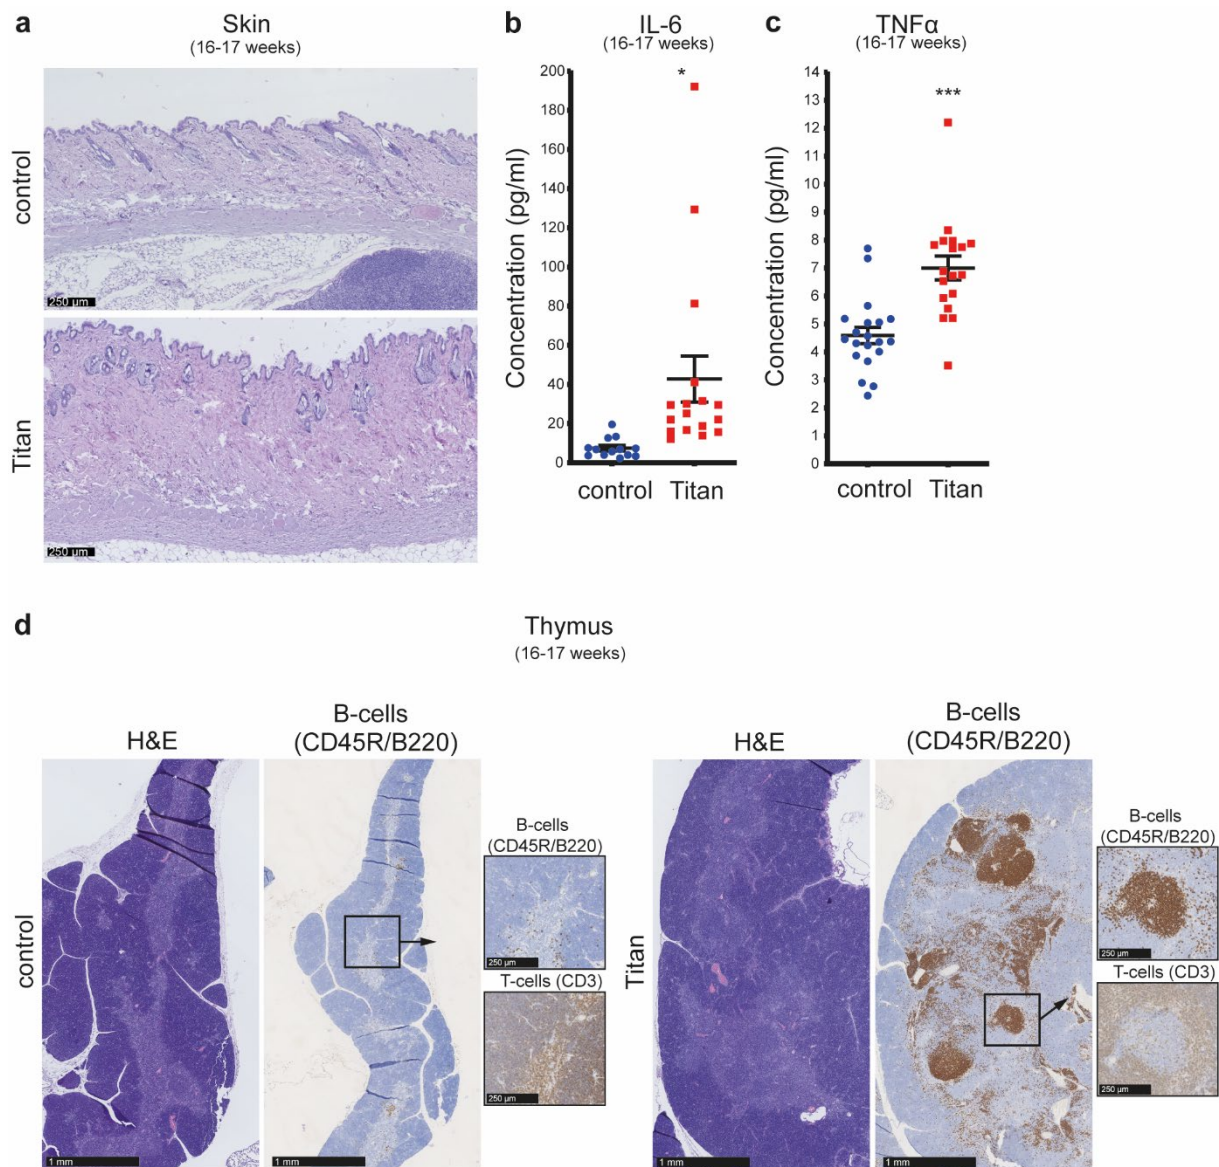

**Supplementary Figure 5: Titan mice show thickened dermis and early signs of increased inflammation.**

Comparison of Titan and control mice at 16–17 weeks of age. ( $n = 4–6$  per group). **a** Representative images of hematoxylin and eosin staining of the skin. The dermis of Titan mice is substantially thicker compared to control animals **b,c** IL-6 plasma levels ( $p = 0.0086$ ) in control ( $n = 13$ ) and Titan ( $n = 17$ ) mice, and TNF $\alpha$  plasma levels in control ( $n = 20$ ) and Titan ( $n = 18$ ) mice. **d** Representative images of hematoxylin and eosin staining and B-cell immunohistochemistry (IHC) of the thymus of control (left) and Titan (right) mice (2.5x magnification). IHC of thymic medullar nodes revealed that they are composed mainly of B-cells (CD45R/B220-positive) instead of T-cells (CD3-positive). Images in squares were taken at 10x magnification. \* $p < 0.05$ , \*\*\* $p < 0.001$ . Error bars indicate SEM. Unpaired two-tailed  $t$ -tests with Welch's correction were used to calculate  $p$ -values.

control  
(16-17 weeks)

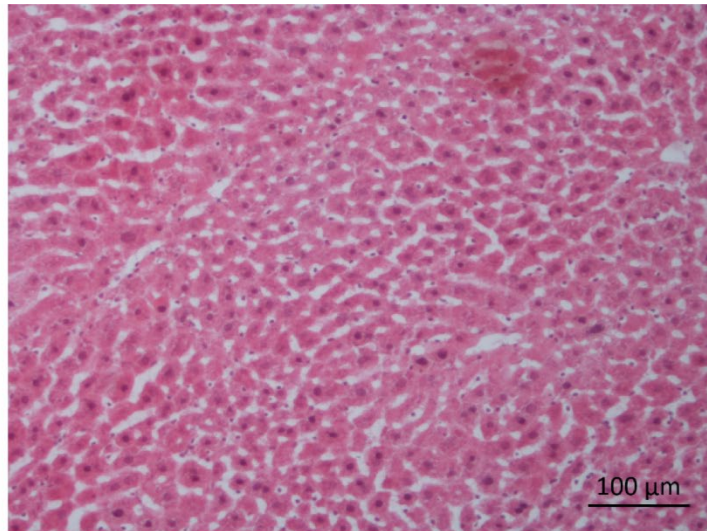

Titan  
(16-17 weeks)

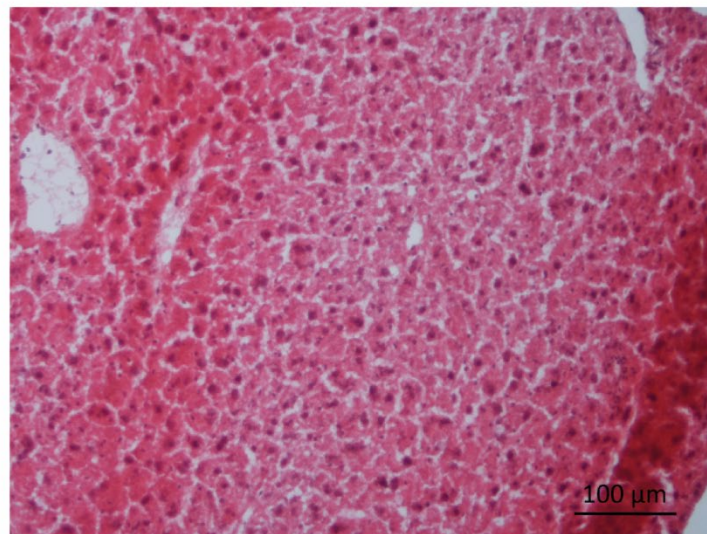

**Supplementary Figure 6: Liver H&E staining comparison of control vs. Titan mice.**

Shown are representative hematoxylin and eosin-stained images of the liver from 16-17-weeks old control and Titan mice.

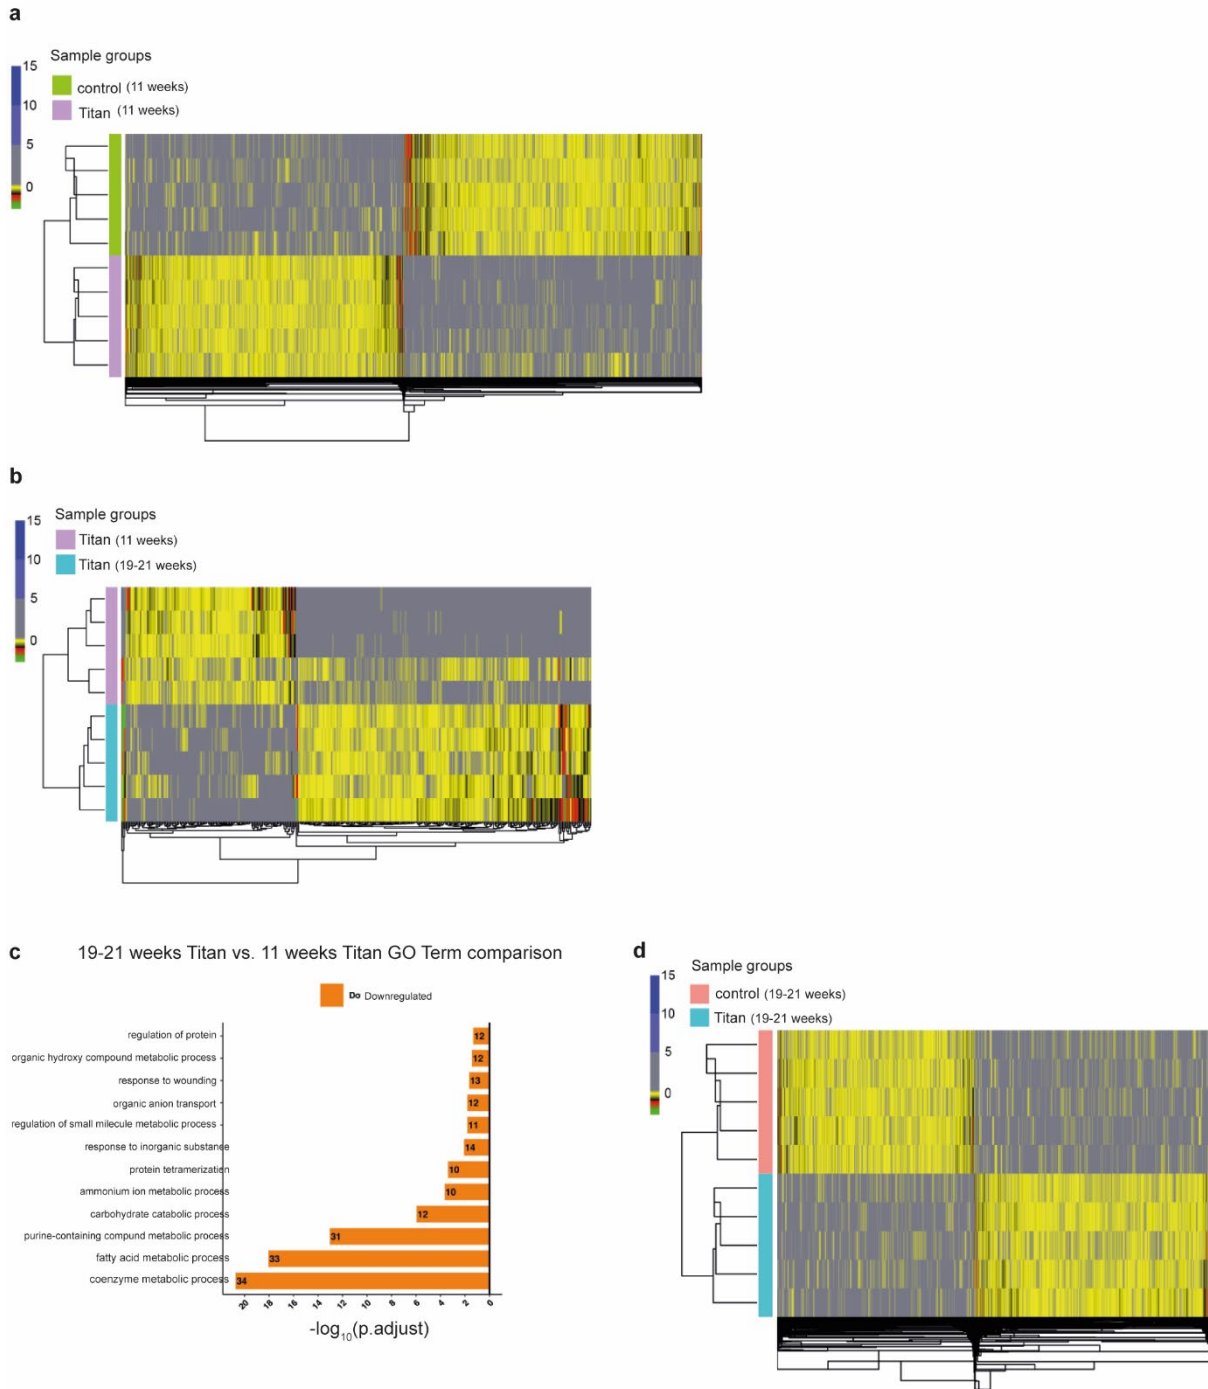

**Supplementary Figure 7: Transcriptome changes in the liver of younger vs. older Titan mice.**

**a** Heat map showing significantly altered genes between 11-week-old control and Titan mice. **b** Heat map showing significantly altered genes between 11- and 19-21-week-old Titan mice. **c** Gene ontology term analysis of altered genes (b) revealed a decrease in various metabolic processes including fatty acid metabolism. **d** Heat map showing significantly altered genes between 19-21-week-old control and Titan mice ( $n = 5$  per group).



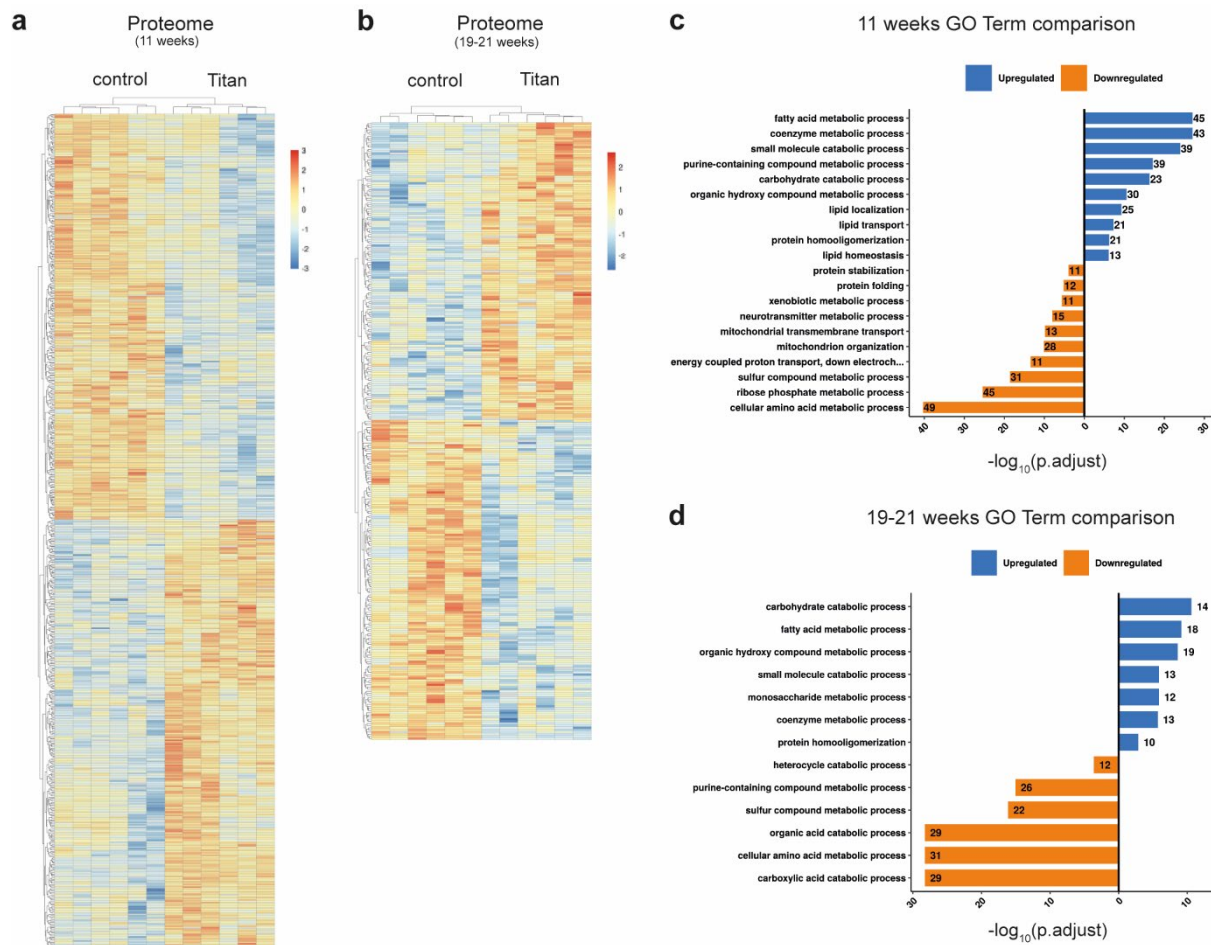

**Supplementary Figure 8: Liver proteome analyses reveal differences in metabolic protein levels between control and Titan mice.**

**a** Heat map comparing proteomes of 11-week-old control and Titan mice. **b** Heat map comparing proteomes of 19-21-week-old control and Titan mice. **c** Gene ontology (GO) term analysis of 11-week-old mice indicated increased fatty acid metabolism, various lipid catabolism processes, and coenzyme metabolism while downregulation in xenobiotic, amino acid and sulfur metabolism. **d** GO term analysis of 19-21-week-old mice showed upregulation of proteins involved in fatty acid metabolism, carbohydrate catabolism and coenzyme metabolism and downregulation of proteins involved in amino acid and sulfur metabolism ( $n = 6$  per group).



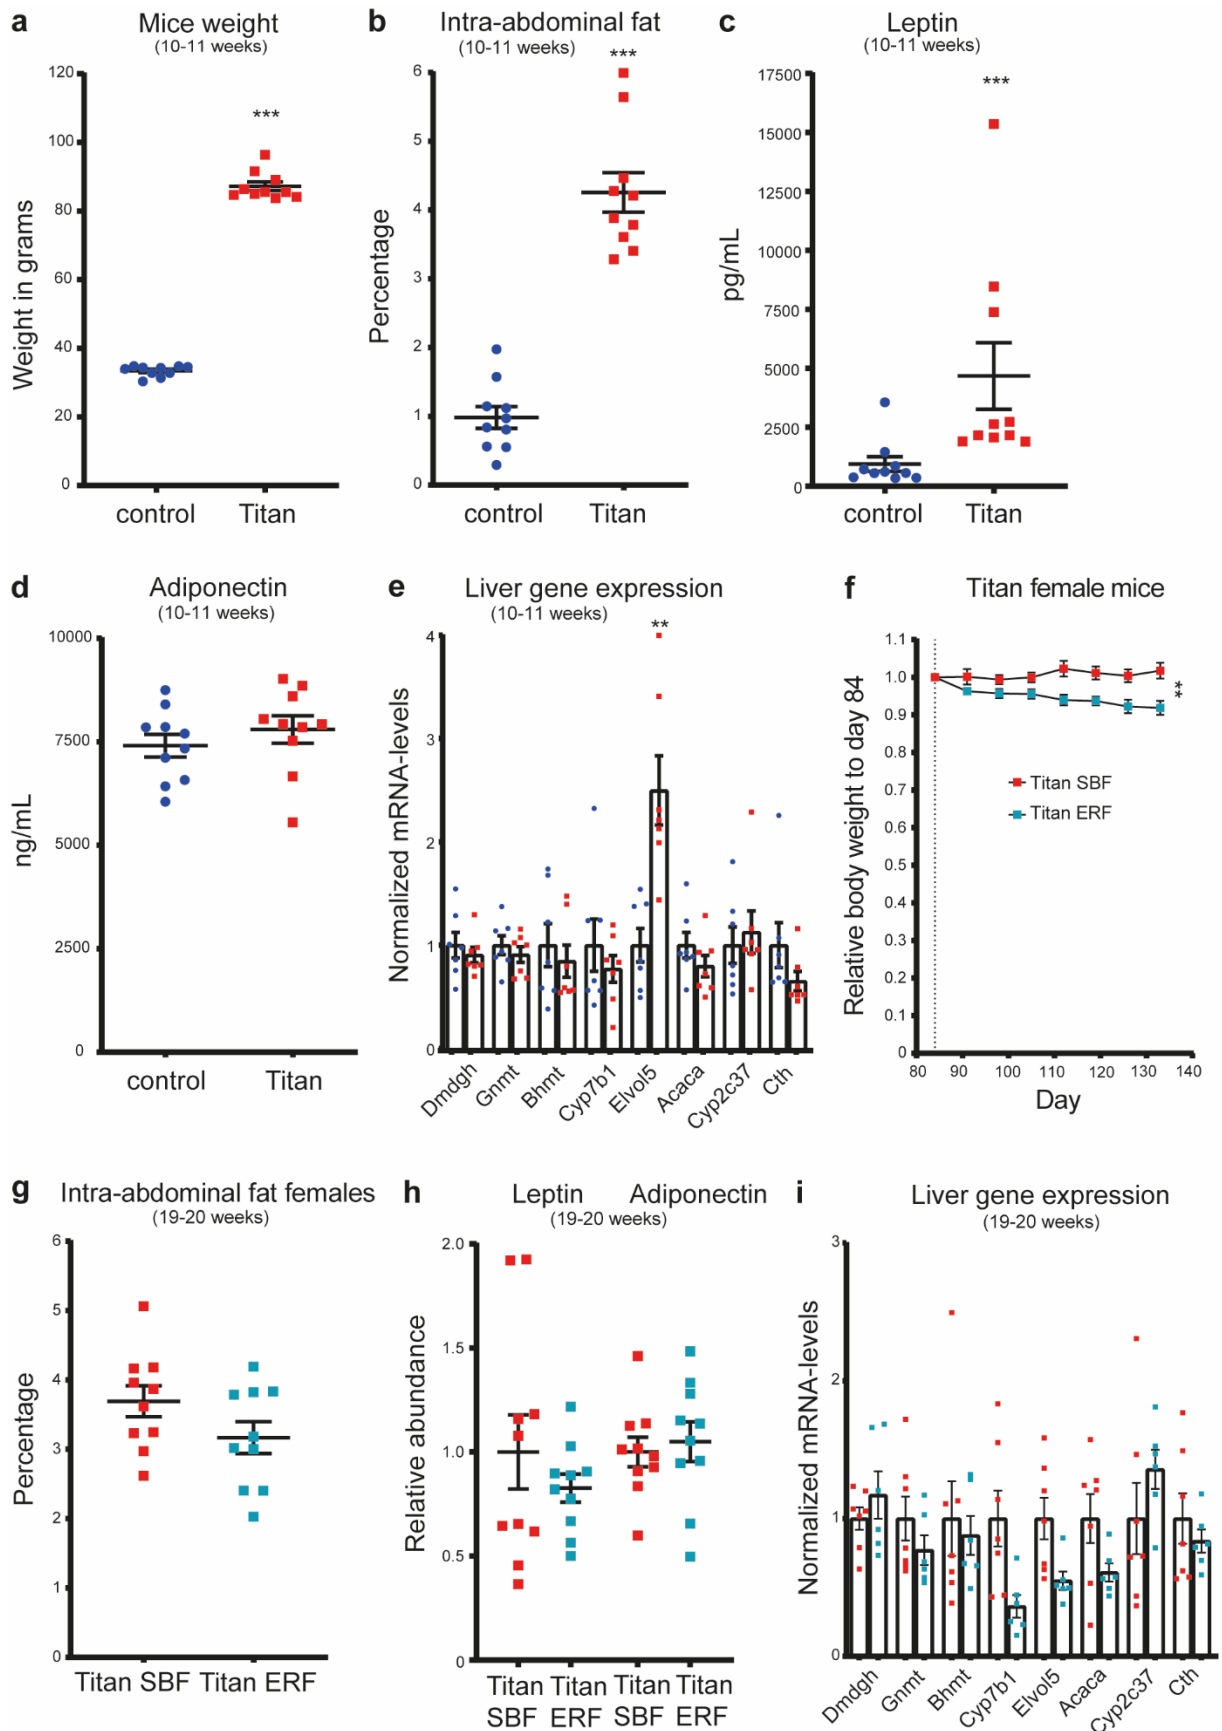

**Supplementary Figure 9: Characterization of female Titan mice.**

**a** At 10–11-weeks old, Titan female mice reached 87 grams on average, whereas average control female animals weighed 33 grams ( $n = 10$  per group). Mann-Whitney  $U$ -test (MWU),  $p < 0.0001$ . **b** Percentage of intra-abdominal fat ( $n = 10$  per group) at the age of 10–11-weeks.  $p < 0.0001$ . **c** Similarly

to males, 10–11-weeks old Titan female mice show increased leptin levels compared with female control mice ( $n = 10$  per group). MWU-test,  $p = 0.0005$ . **d** Similar adiponectin levels were observed between 10–11-weeks Titan and control female mice ( $n = 10$  per group).  $p = 0.3756$ . **e** RT-PCR comparing gene expression of candidate genes of 10-11 weeks of age Titan and control female mice ( $n = 7$  per group). Non-parametric test was performed followed by multiple corrections to calculate  $p$ -values;  $pval.adj$  (*Dmdg*) = 0.992, (*Gnmt*) = 0.992, (*Bhmt*) = 0.992, (*Cyp7b1*) = 0.992, (*Elovl5*) = 0.00928, (*Cyp2c37*) = 0.992, (*Acaca*) = 0.992, (*Cth*) = 0.299. **f** Switching standard breeding feed (SBF) to enegery reduced feed (ERF) at 12 weeks resulted in a persistent average weight loss in Titan females ( $n = 10$  per group). MWU-test at 19 weeks,  $p = 0.0015$ . **g,h** ERF- and SBF-fed female Titan mice have similar percentage of intra-abdominal fat at 19-20 weeks ( $p = 0.121$ ), leptin ( $p = 0.3746$ ) and adiponectin ( $p = 0.6817$ ;  $n = 10$  per group). **i** RT-PCR comparing gene expression of candidate genes of ERF- and SBF-fed Titan mice females at 19-20 weeks of age ( $n = 7$  per group).  $t$ -test was performed followed by multiple correction to calculate  $p$ -values;  $pval.adj$  (*Dmdg*) = 0.948, (*Gnmt*) = 0.588, (*Bhmt*) = 0.972, (*Cyp7b1*) = 0.0938, (*Elovl5*) = 0.0634, (*Cyp2c37*) = 0.588, (*Acaca*) = 0.588, (*Cth*) = 0.974.  $**p < 0.01$ ,  $***p < 0.001$ .

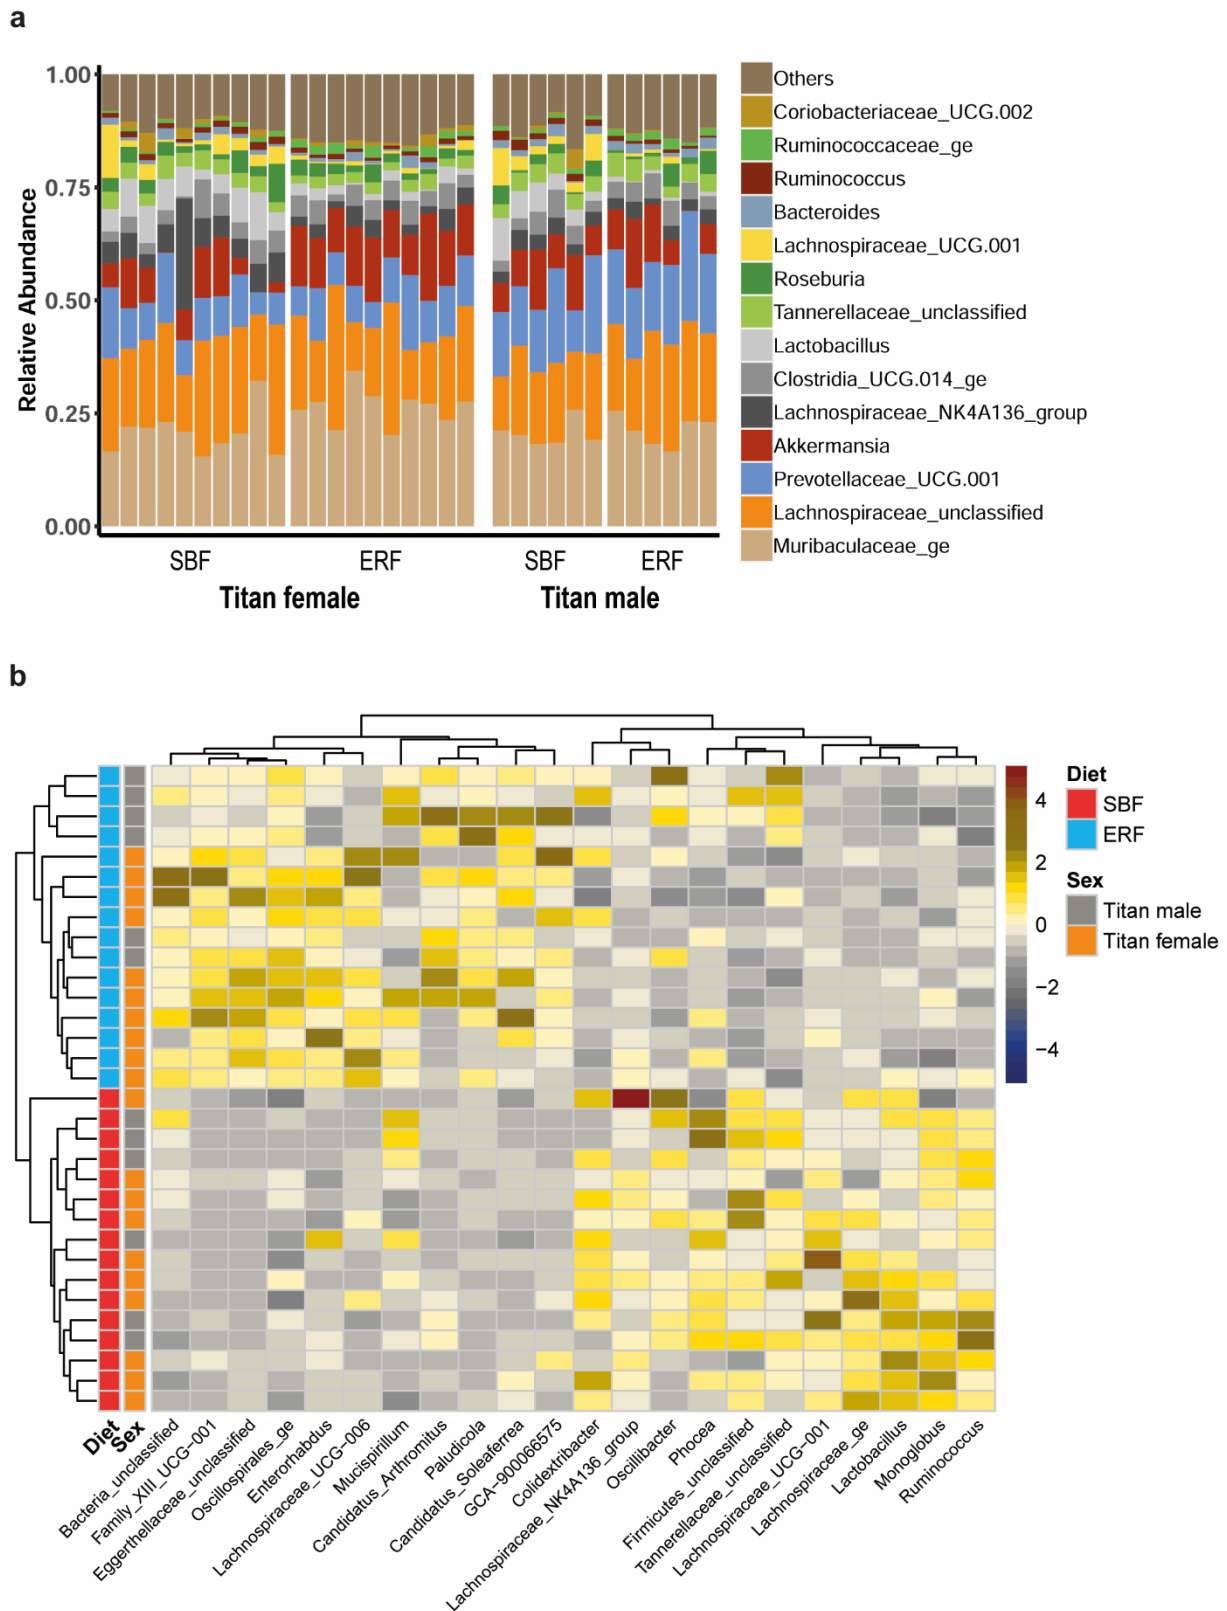

**Supplementary Figure 10: Late dietary intervention by switching to ERF alters the microbiome in Titan mice.**

**a** Taxa plot representation of the microbial composition considering the most abundant genera in caecum digesta of standard breeding feed (SBF) and energy reduced feed (ERF) fed Titan mice. **b** Heat map showing significantly changed microbial genera between ERF- and SBF-fed Titan mice.

## Supplementary Tables

**Supplementary table 1: Lifespans in days for Titan mice receiving standard breeding feed (SBF) and energy reduced feed (ERF), respectively**

| <b>Survival [Days]</b> | <b>Titan SBF</b> | <b>Titan ERF</b> |
|------------------------|------------------|------------------|
| <b>Minimum</b>         | 68               | 71               |
| <b>10% Percentile</b>  | 123              | 214.8            |
| <b>25% Percentile</b>  | 231.5            | 264              |
| <b>75% Percentile</b>  | 405              | 447              |
| <b>90% Percentile</b>  | 475              | 504              |
| <b>Maximum</b>         | 614              | 660              |
| <b>Median</b>          | 323.5            | 374              |
| <b>Mean</b>            | 317.4            | 359.5            |
| <b>Std. Error</b>      | 11.49            | 11.45            |



**Supplementary table 2: Diet composition**

Nutrients of the standard breeding feed (SBF) and energy reduced feed (ERF) used in the dietary intervention trial. The lower energy density of the ERF is largely achieved by a higher proportion of dietary fiber. Micronutrients not listed can be considered equal in both feeds. ssniff Spezialdiäten GmbH, Soest, Germany, V1124-300 (SBF) and V1574-300 (ERF), autoclavable.

|                                                  | <b>Standard breeding feed</b>                                                                      | <b>Energy reduced feed</b>                                                                                                                             |
|--------------------------------------------------|----------------------------------------------------------------------------------------------------|--------------------------------------------------------------------------------------------------------------------------------------------------------|
| <b>Metabolizable energy [MJ kg<sup>-1</sup>]</b> | 14.0                                                                                               | 11.7                                                                                                                                                   |
| <b>Crude protein [%]</b>                         | 22.0                                                                                               | 15.0                                                                                                                                                   |
| <b>Crude fat [%]</b>                             | 4.5                                                                                                | 3.1                                                                                                                                                    |
| <b>Crude fiber [%]</b>                           | 3.9                                                                                                | 14.2                                                                                                                                                   |
| <b>Crude ash [%]</b>                             | 6.5                                                                                                | 7.8                                                                                                                                                    |
| <b>Starch [%]</b>                                | 34.2                                                                                               | 20.8                                                                                                                                                   |
| <b>Sugar [%]</b>                                 | 5.1                                                                                                | 5.4                                                                                                                                                    |
| <b>Nitrogen free extracts [%]</b>                | 51.2                                                                                               | 48.8                                                                                                                                                   |
| <b>Micronutrients (selection)</b>                |                                                                                                    |                                                                                                                                                        |
| <b>Potassium [%]</b>                             | 0.98                                                                                               | 1.47                                                                                                                                                   |
| <b>Fatty acid C18:0 [%]</b>                      | 0.14                                                                                               | 0.08                                                                                                                                                   |
| <b>Fatty acid C18:1 [%]</b>                      | 1.03                                                                                               | 0.43                                                                                                                                                   |
| <b>Fatty acid C18:2 [%]</b>                      | 2.42                                                                                               | 1.44                                                                                                                                                   |
| <b>Lysine [%]</b>                                | 1.48                                                                                               | 0.84                                                                                                                                                   |
| <b>Methionine [%]</b>                            | 0.50                                                                                               | 0.36                                                                                                                                                   |
| <b>Cysteine [%]</b>                              | 0.39                                                                                               | 0.27                                                                                                                                                   |
| <b>Threonine [%]</b>                             | 0.83                                                                                               | 0.58                                                                                                                                                   |
| <b>Arginine [%]</b>                              | 1.38                                                                                               | 0.77                                                                                                                                                   |
| <b>Histidine [%]</b>                             | 0.57                                                                                               | 0.34                                                                                                                                                   |
| <b>Valine [%]</b>                                | 1.06                                                                                               | 0.75                                                                                                                                                   |
| <b>Isoleucine [%]</b>                            | 0.95                                                                                               | 0.60                                                                                                                                                   |
| <b>Leucine [%]</b>                               | 1.67                                                                                               | 1.17                                                                                                                                                   |
| <b>Phenylalanine [%]</b>                         | 1.04                                                                                               | 0.68                                                                                                                                                   |
| <b>Glycine [%]</b>                               | 0.95                                                                                               | 0.69                                                                                                                                                   |
| <b>Glutamic acid [%]</b>                         | 4.56                                                                                               | 2.67                                                                                                                                                   |
| <b>Aspartic acid [%]</b>                         | 2.20                                                                                               | 1.24                                                                                                                                                   |
| <b>Proline [%]</b>                               | 1.38                                                                                               | 1.06                                                                                                                                                   |
| <b>Serine [%]</b>                                | 1.17                                                                                               | 0.68                                                                                                                                                   |
| <b>Alanine [%]</b>                               | 1.01                                                                                               | 0.78                                                                                                                                                   |
| <b>Vitamin K [mg]</b>                            | 20                                                                                                 | 80                                                                                                                                                     |
| <b>Iron [mg]</b>                                 | 192                                                                                                | 276                                                                                                                                                    |
| <b>Dietary composition</b>                       | Wheat and wheat products, soybean/-oil, products, corn, minerals, yeast, micronutrient supplements | Alfalfa meal, wheat and wheat products, barley, corn gluten, sunflower seeds, oat bran, soybeans, sugar beet pulp, molasses, micronutrient supplements |
