# Supplementary material for: Dietary intervention improves health metrics and life expectancy of the genetically obese Titan mouse
Source: PubMed Central journal article supplement (PMC9065075; doi:10.1038/s42003-022-03339-3), 2022-05-03
Supplement: 42003_2022_3339_MOESM2_ESM.pdf [file 42003_2022_3339_MOESM2_ESM.pdf]

## Description of Additional Supplementary Files

**File name:** Supplementary data 1

**Description:** Unique RDD in Titan mice

**File name:** Supplementary data 2:

**Description:** Unique RDD in Titan mice excluding DU6P mice

**File name:** Supplementary data 3

**Description:** RNAseq significantly altered genes, 11 weeks

**File name:** Supplementary data 4

**Description:** RNAseq significantly altered genes, 19-21 weeks

**File name:** Supplementary data 5

**Description:** Proteome data for supplementary figure 8

**File name:** Supplementary data 6

**Description:** Raw data for plasma analysis for figure 6c

**File name:** Supplementary data 7

**Description:** Microbiome analysis of SBF vs ERF male and female mice

**File name:** Supplementary data 8

**Description:** Key resources and real time PCR primer sequences
